# Supplementary figures and images for: Comprehensive Analysis and Functional Characteristics of Differential Expression of N6-Methyladenosine Methylation Modification in the Whole Transcriptome of Rheumatoid Arthritis
Source: Hindawi journal article supplement (doi:10.1155/2022/4766992), 2022-10-25

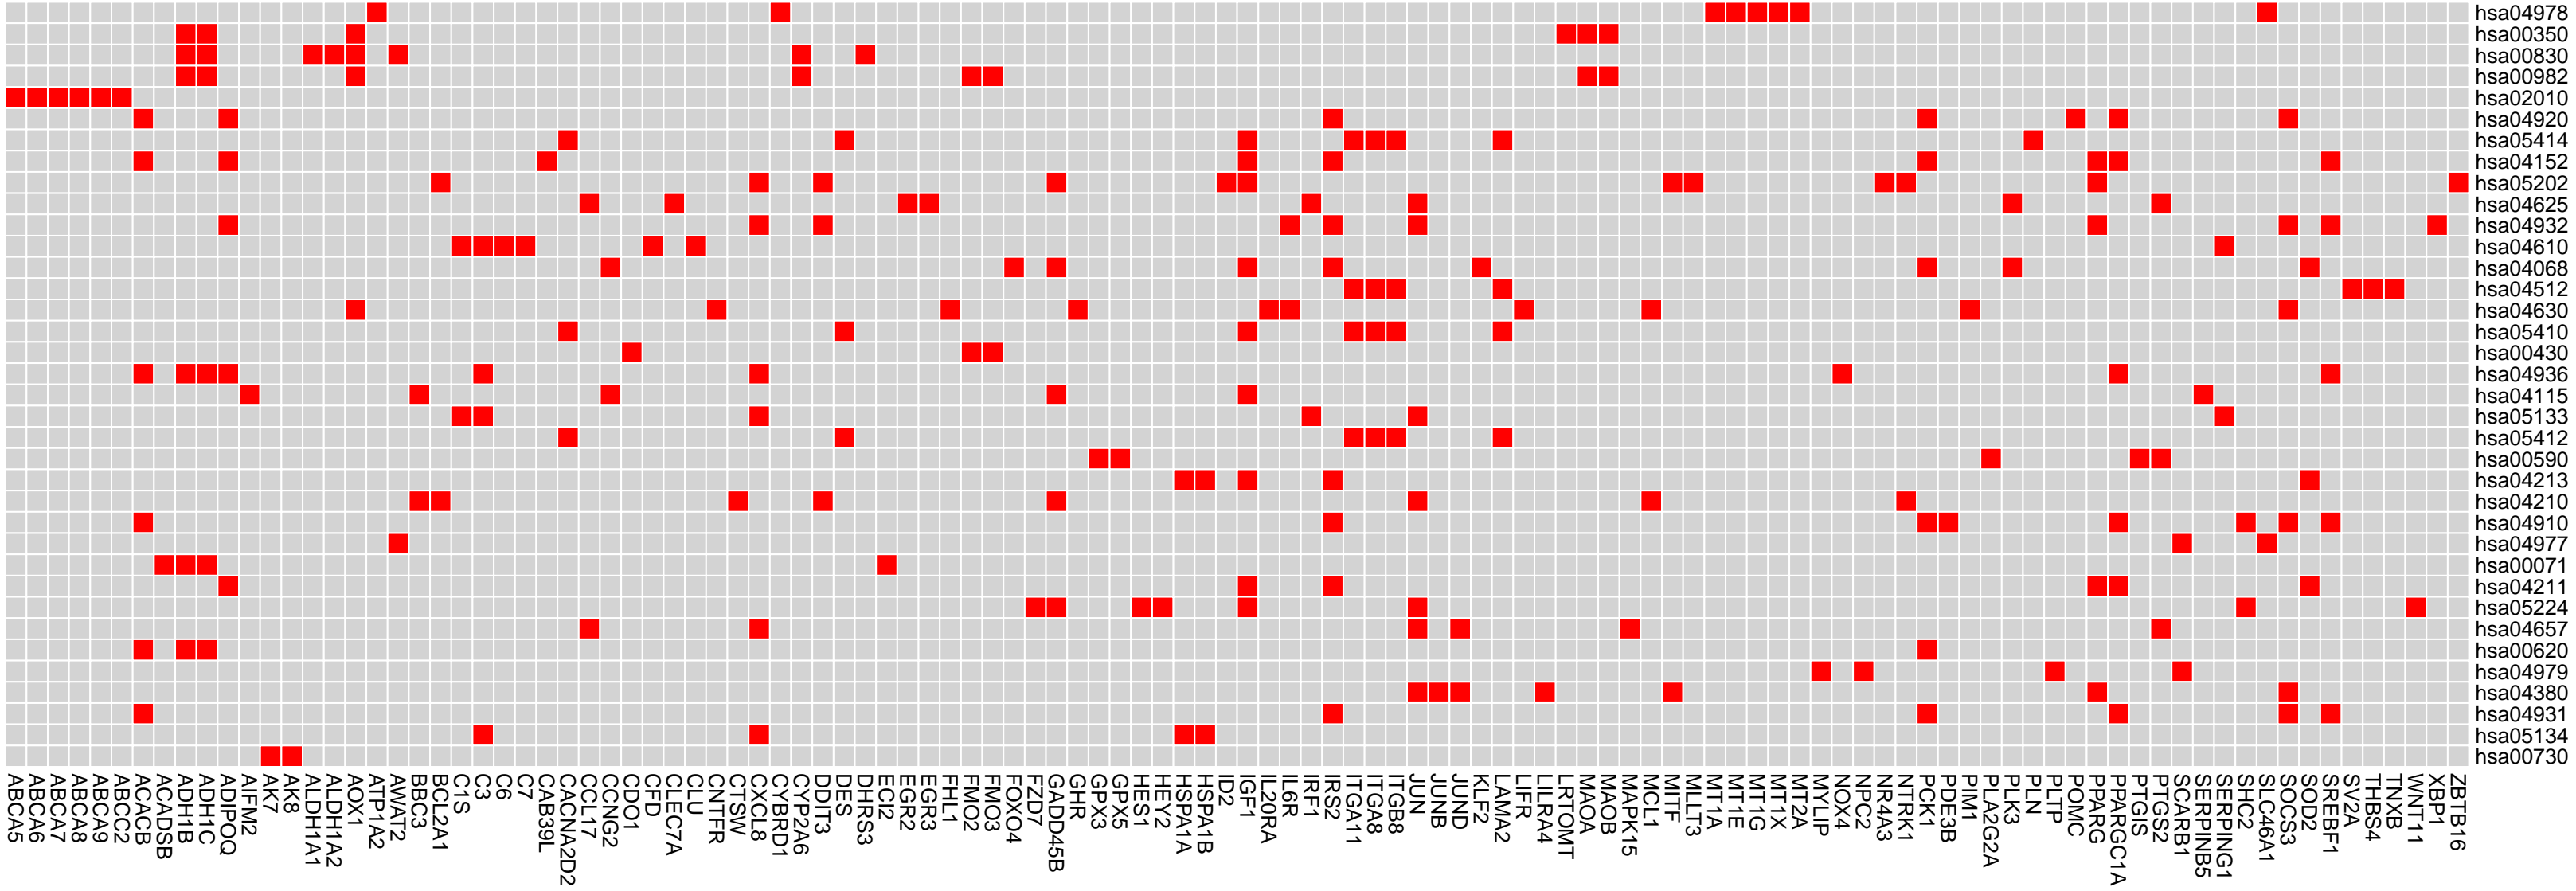

Supplement: f1 [file 4766992.f1.zip]

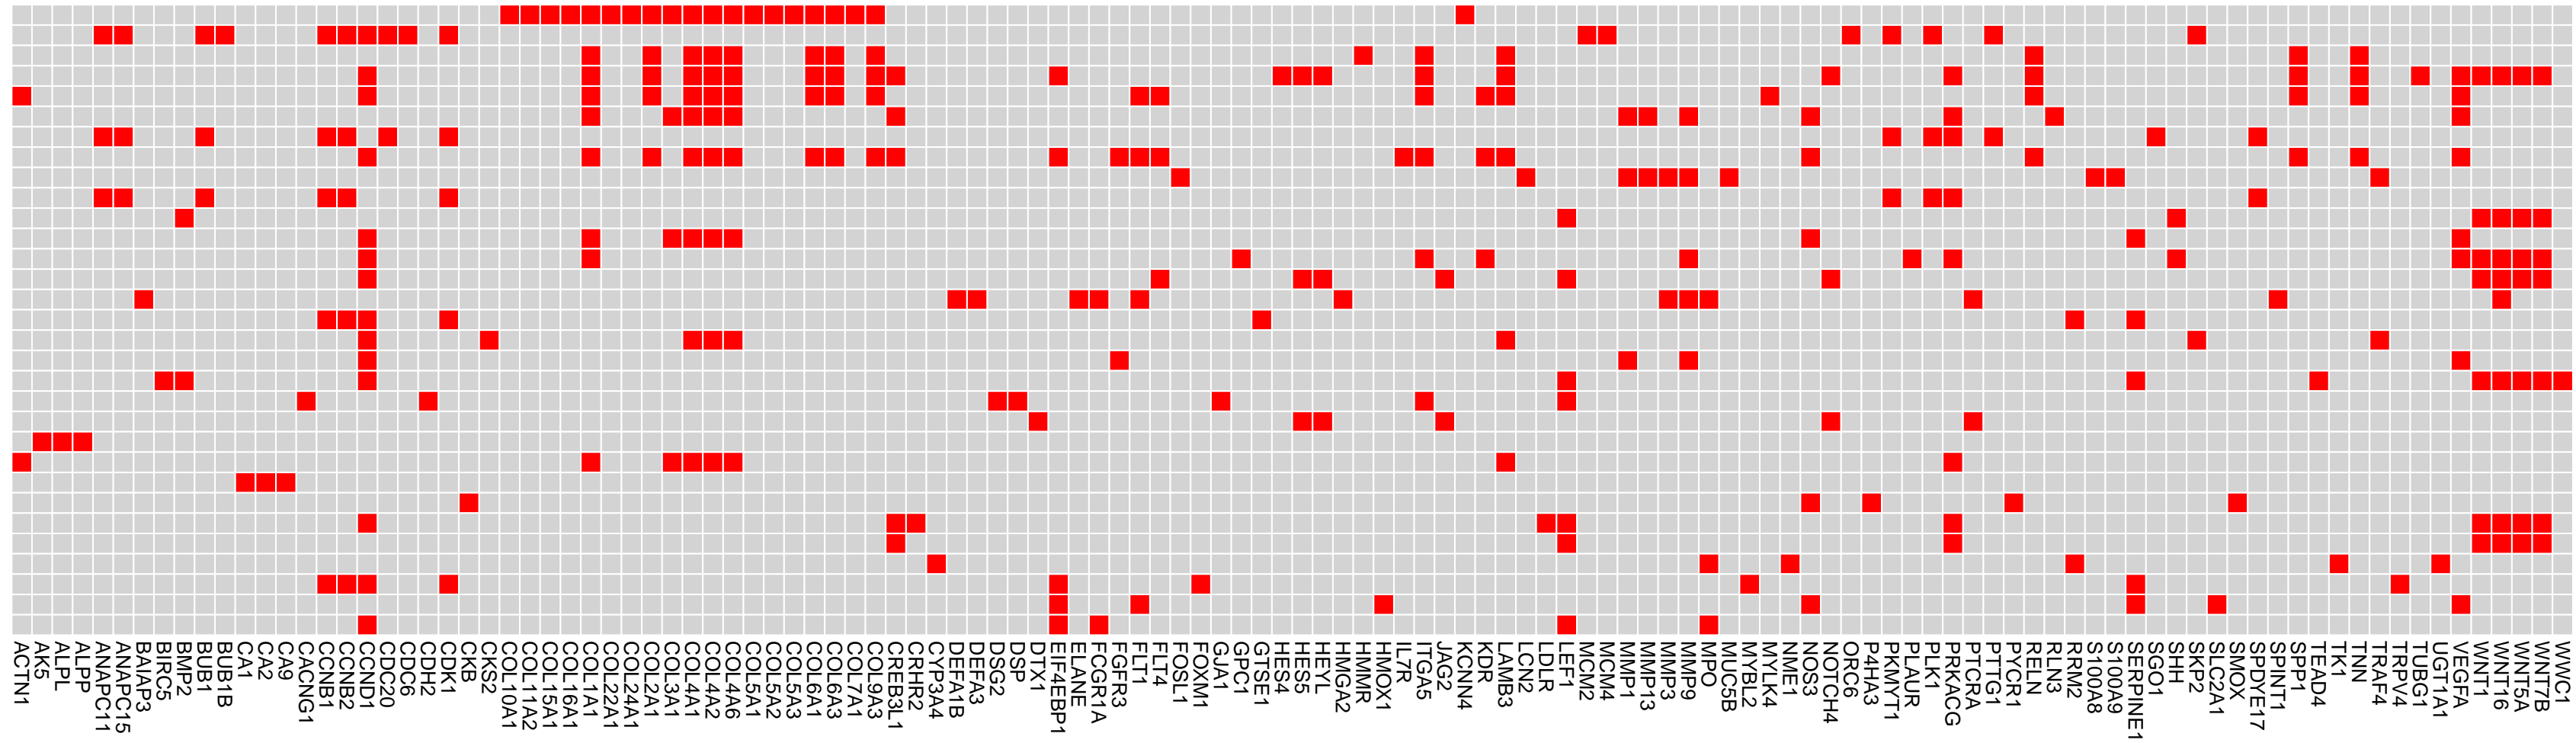

Supplement: f1 [file 4766992.f1.zip]

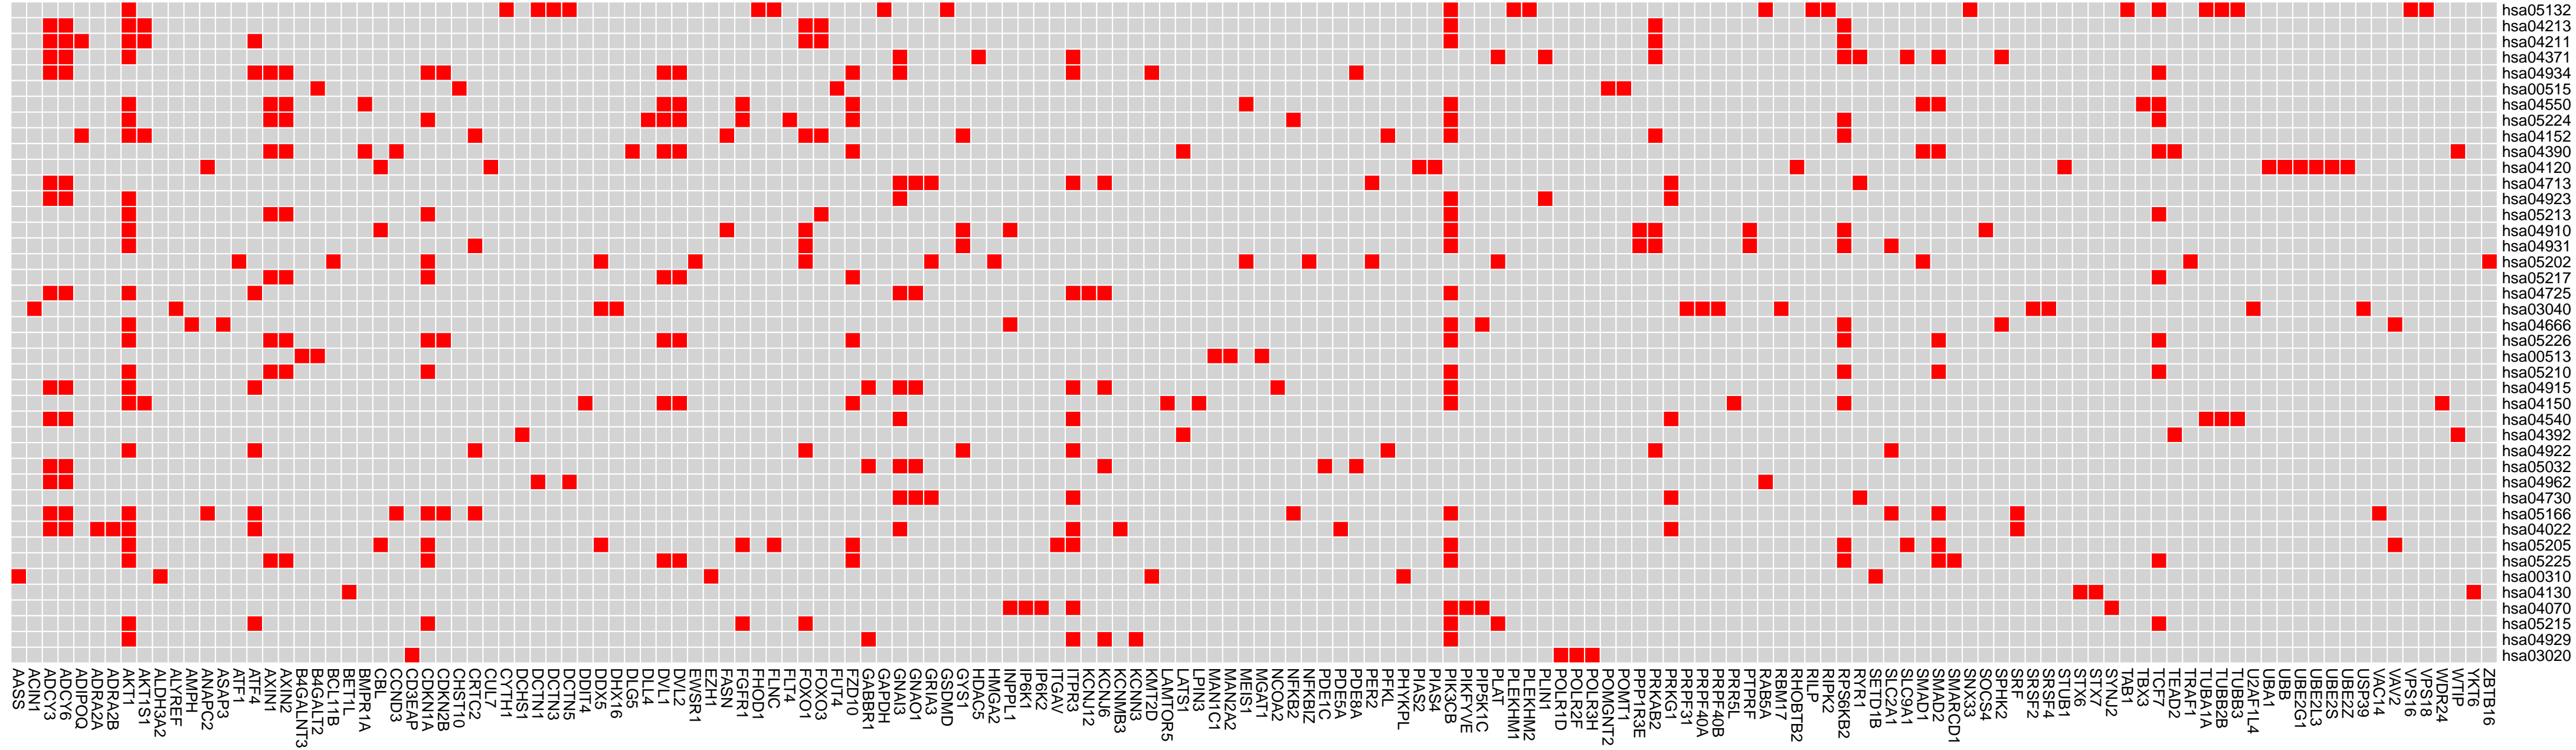

Supplement: f1 [file 4766992.f1.zip]

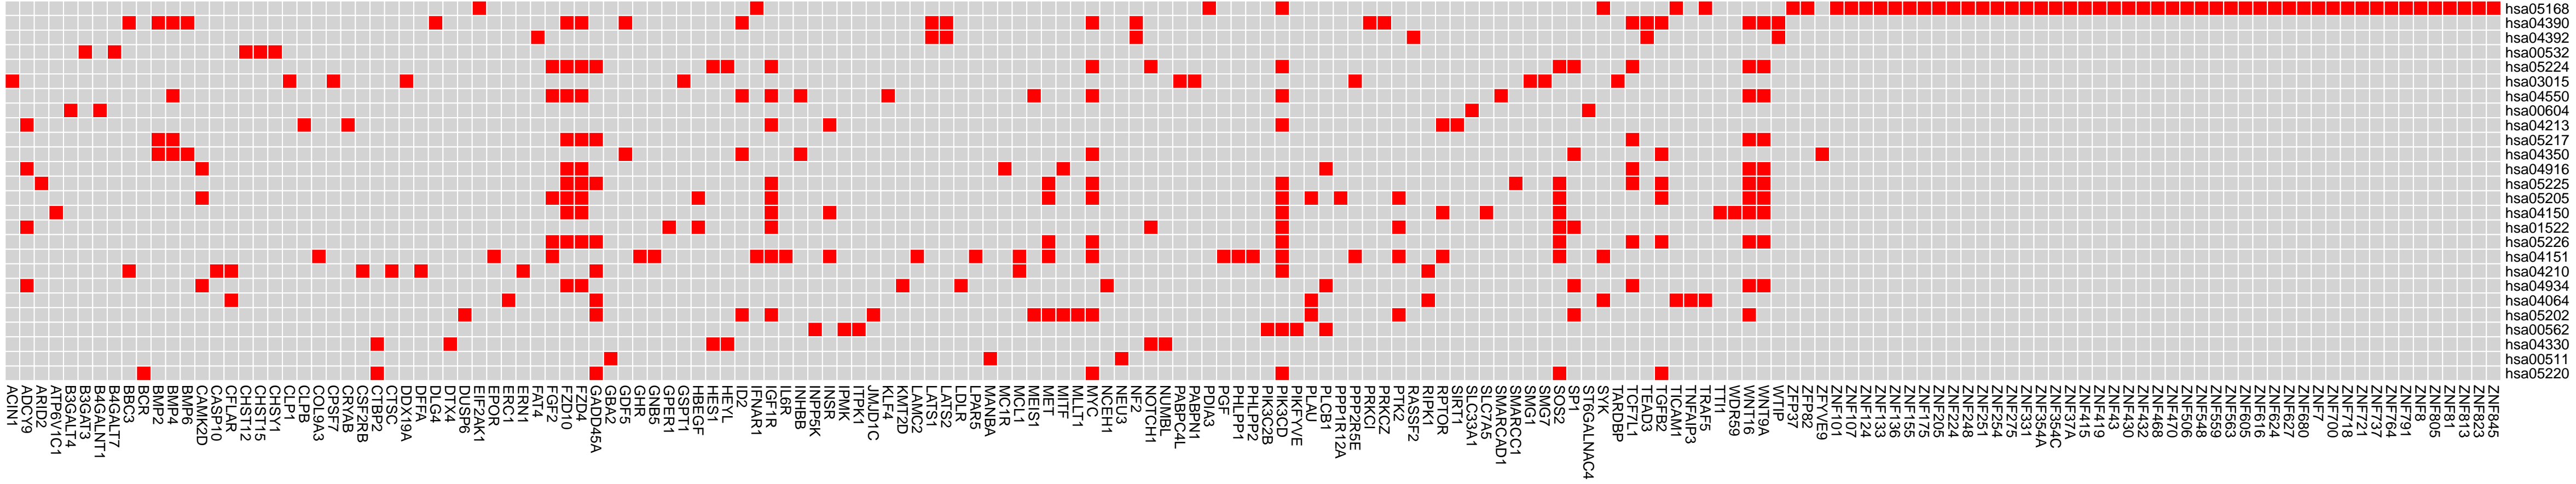

Supplement: f1 [file 4766992.f1.zip]
